# Supplementary material for: Electrochemical synthesis of Fe oxide-based catalysts for the growth of nanocarbons
Source: Royal Society of Chemistry journal article supplement (doi:10.1039/c4ra09803j), 2014-01-01
Supplement: c4ra09803j1.pdf [file c4ra09803j1.pdf]

Electronic Supplementary Information (ESI)

RSC Advances

**Electrochemical preparation of Fe oxide-based catalysts for  
the synthesis of nanocarbons**

Sofía Pérez-Villar,\* Javier Carretero-González

CIC EnergiGUNE, Alava Technology Park, Miñano, Álava, 01510, Spain

E-mail: s\_pv\_es@yahoo.es.

**Contents**

**Fig. 1S** Linear sweep voltammetry for (a) anhydrous  $\text{FeCl}_2$ ,  $\text{Fe}(\text{NO}_3)_3 \cdot 9\text{H}_2\text{O}$  and  $\text{FeCl}_3 \cdot 6\text{H}_2\text{O}$  baths at room temperature, 50 °C and 100 °C. The working electrode is the Al-Mg mesh, the counter is a platinum foil and the reference electrode is the standard Ag/AgCl.

**Fig. 2S** Potentiostatic current-time transients for (a)  $\text{FeCl}_3 \cdot 6\text{H}_2\text{O}$  and (b)  $\text{Fe}(\text{NO}_3)_3 \cdot 9\text{H}_2\text{O}$  baths at room temperature, 50 °C and 100 °C.

**Fig. 3S** SEM images of carbon nanostructures grown on Al-Mg substrate. Fe-based catalyst synthesized in a  $\text{FeCl}_2$  bath at 50 °C (a) in a  $\text{FeCl}_3 \cdot 6\text{H}_2\text{O}$  bath at room temperature (b) and  $\text{Fe}(\text{NO}_3)_3 \cdot 9\text{H}_2\text{O}$  bath at 50 °C (c).

**Fig. 4S** SEM and EDS of a Fe-based catalyst without grown of C nanofilaments on the substrate (upper) and on the particle (bottom) after CVD.

**Table 1S** D and G band positions and its intensity ratio for the different carbonaceous materials.

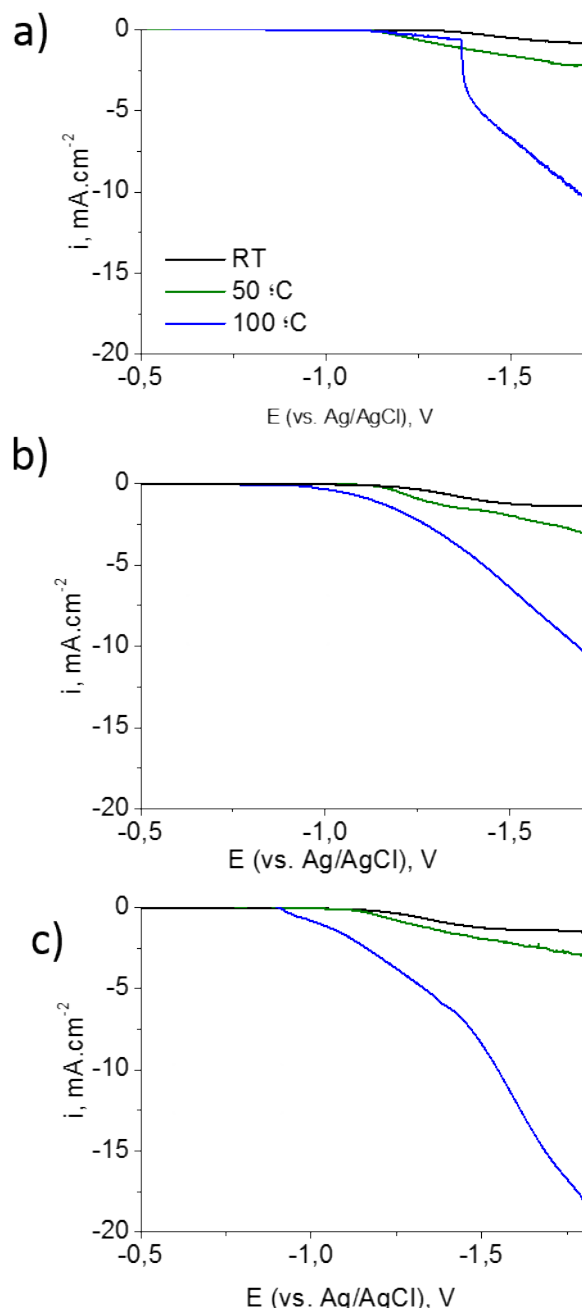

Fig. 1S Linear sweep voltammetry for (a) anhydrous  $\text{FeCl}_2$ ,  $\text{Fe}(\text{NO}_3)_3\cdot 9\text{H}_2\text{O}$  and  $\text{FeCl}_3\cdot 6\text{H}_2\text{O}$  baths at room temperature, 50 °C and 100 °C. The working electrode is the Al-Mg mesh, the counter is a platinum foil and the reference electrode is the standard Ag/AgCl.

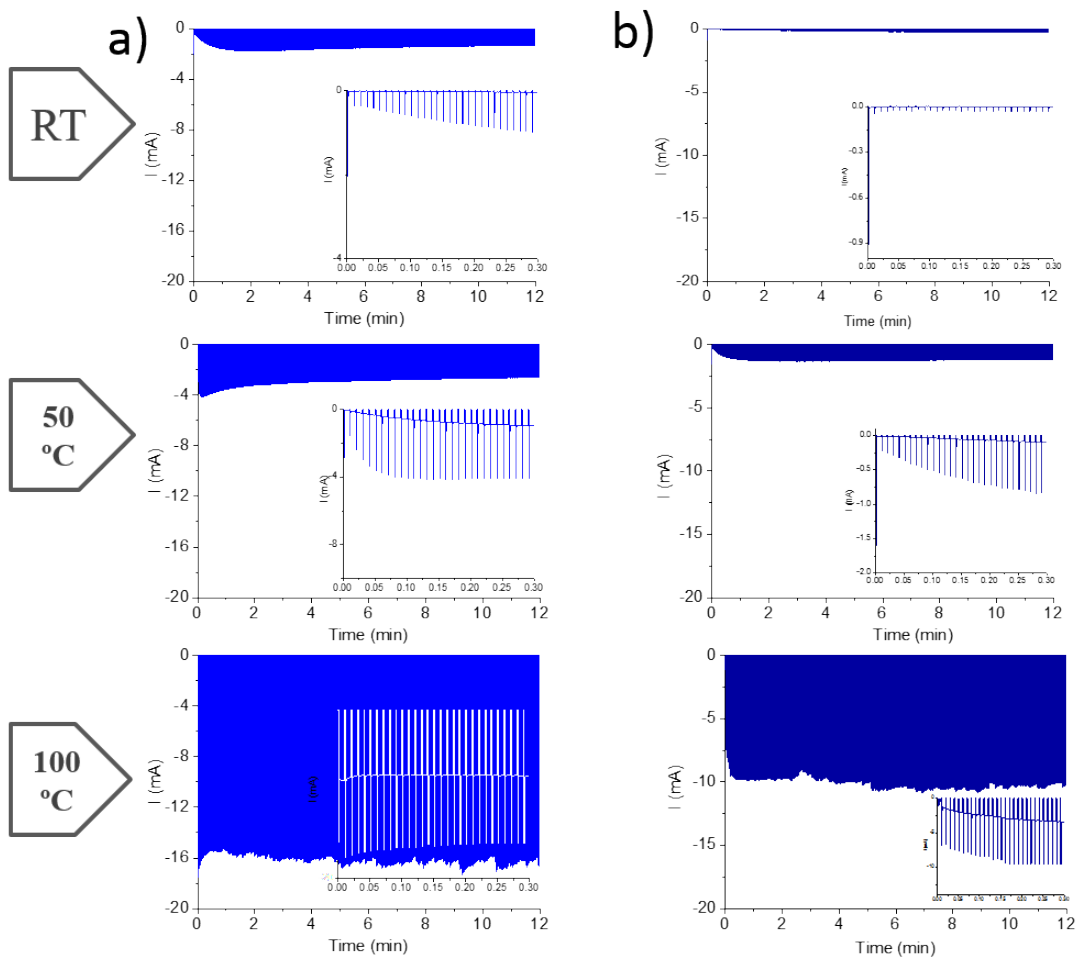

Fig. 2S Potentiostatic current-time transients for (a)  $\text{FeCl}_3 \cdot 6\text{H}_2\text{O}$  and (b)  $\text{Fe}(\text{NO}_3)_3 \cdot 9\text{H}_2\text{O}$  baths at room temperature, 50 °C and 100 °C.

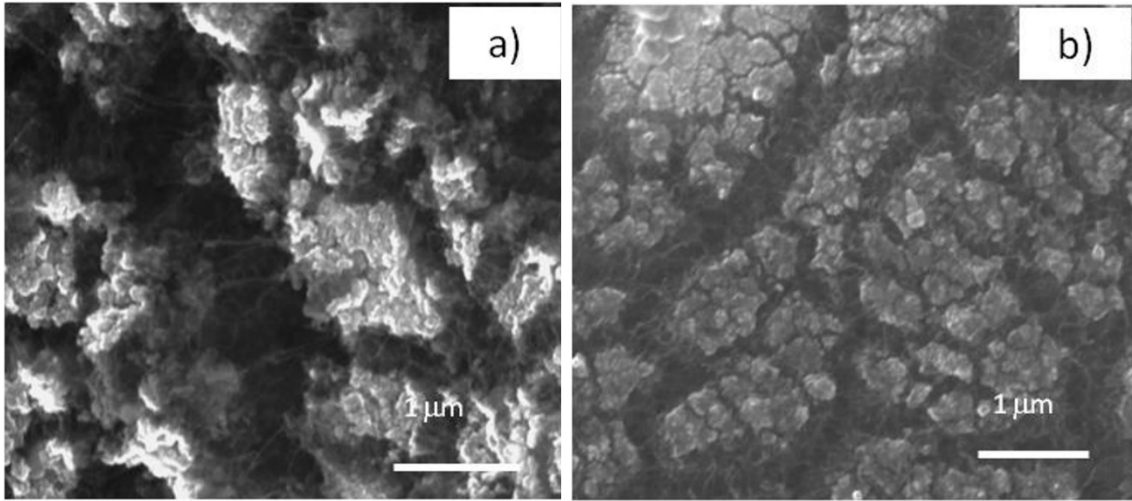

Fig. 3S SEM images of carbon nanostructures grown on Al-Mg substrate. Fe-based catalyst synthesized (a) in a  $\text{FeCl}_3 \cdot 6\text{H}_2\text{O}$  bath at room temperature (b) and  $\text{Fe}(\text{NO}_3)_3 \cdot 9\text{H}_2\text{O}$  bath at 50 °C (c).

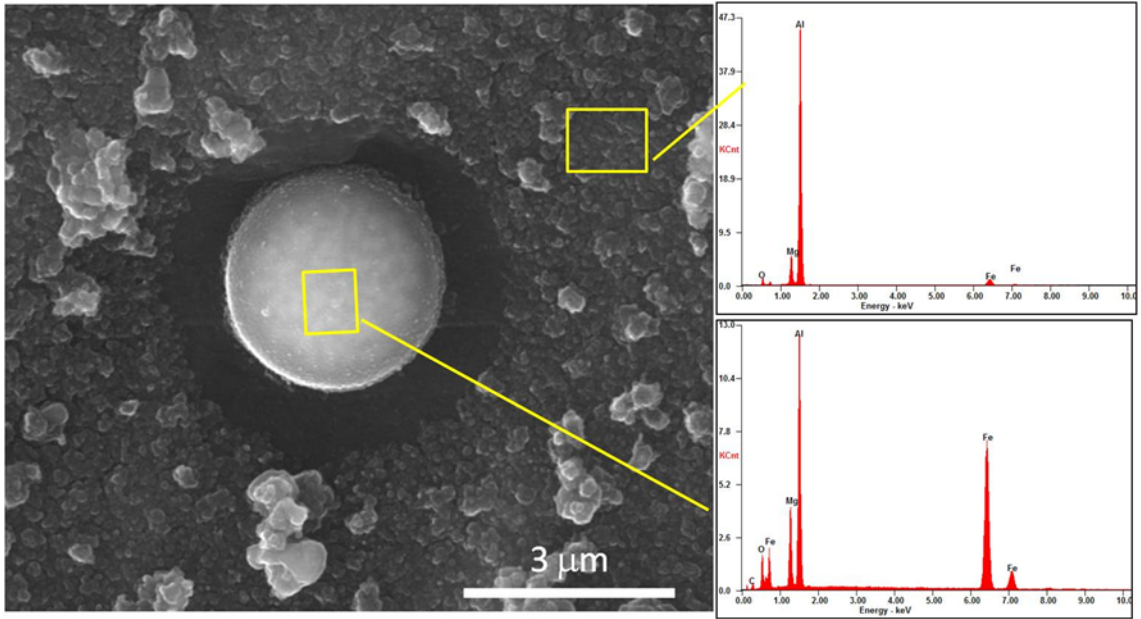

Fig. 4S SEM of a Fe-based catalyst without grown of C nanofilaments after CVD. EDS analysis on the substrate (upper) and on the particle (bottom).

**Table 1S** D and G band positions and its intensity ratio for the different carbonaceous materials.

| Bath-based SAMPLES                                          | D ( $A_{1g}$ )<br>( $\text{cm}^{-1}$ ) | G ( $E_{2g2}$ )<br>( $\text{cm}^{-1}$ ) | $I_D/I_G$ |
|-------------------------------------------------------------|----------------------------------------|-----------------------------------------|-----------|
| Fe(NO <sub>3</sub> ) <sub>3</sub> .9H <sub>2</sub> O, 50 °C | 1346                                   | 1601                                    | 0.84      |
| FeCl <sub>3</sub> , RT                                      | 1342                                   | 1605                                    | 0.78      |
| FeCl <sub>2</sub> , 50 °C                                   | 1341                                   | 1603                                    | 0.75      |
| Other ED samples                                            | 1348                                   | 1588                                    | 0.97      |
| Carbon black                                                | 1348                                   | 1588                                    | 0.87      |
| MWCNT                                                       | 1348                                   | 1588                                    | 0.68      |
